# Supplementary material
Source: publisher site journal article supplement (https://www.dovepress.com/article/584230)
Supplement: Supplementary file 1 [file 584230%20Revised%20Supplementary%20Table%20S1.docx]

**Supplementary Table S1.** Nominal p-values and FDR-adjusted q-values for genomic and immune microenvironment analyses

| **Analysis Domain** | **Variables** | **Model/Test** | **Effect Estimate** | **95% CI** | **Nominal p-value** | **FDR q-value** |
| --- | --- | --- | --- | --- | --- | --- |
| Genomic (PFS) | PIK3CA alteration | Cox regression | HR = 1.4 | 0.9–2.1 | 0.12 | 0.24 |
| Genomic (PFS) | PTEN loss | Cox regression | HR = 1.3 | 0.8–2.0 | 0.21 | 0.31 |
| Genomic (PFS) | MTOR alteration | Cox regression | HR = 1.2 | 0.7–1.9 | 0.34 | 0.40 |
| Genomic (PFS) | FGF/FGFR alteration | Cox regression | HR = 1.5 | 0.9–2.4 | 0.08 | 0.19 |
| Genomic (PFS) | EGFR alteration | Cox regression | HR = 0.8 | 0.5–1.3 | 0.42 | 0.45 |
| Immune (Response) | CD8⁺ T‑cell density | Mann–Whitney U | Median: 386 vs 112 cells/mm² | — | 0.008 | 0.03 |
| Immune (Response) | CD163⁺/CD8⁺ ratio | Mann–Whitney U | Median: 1.2 vs 3.4 | — | 0.01 | 0.04 |

FDR-adjusted q-values were calculated using the Benjamini–Hochberg method within prespecified analysis sets (genomic and immune analyses). Genomic analyses were performed using univariable Cox regression for progression-free survival (PFS). Immune comparisons were conducted using the Mann–Whitney U test. All analyses are exploratory.
